# Supplementary material for: Optimizing Discharge Opioid Prescribing Practices After Mastectomy With Immediate Reconstruction
Source: PubMed Central journal article supplement — Mayo Clin Proc Innov Qual Outcomes. 2019 May 27;3(2):183–8. doi: 10.1016/j.mayocpiqo.2019.03.001 (PMC6543550; doi:10.1016/j.mayocpiqo.2019.03.001), 2019-05-27
Supplement: mmc1.pdf [file mmc1.pdf]

## Appendix

### Pain Management Postoperative Discharge Prescribing Guidelines

#### Breast Combined Cases – Mastectomy with Subcutaneous Breast Reconstruction

##### Subcutaneous breast reconstruction

1) Average Pain Patients and all patients over age 65 years

- Schedule acetaminophen 1 Gram every 6 hours x 2 weeks
- Ultram 50 or 100 mg every 6 hours prn pain not relieved by acetaminophen - #20
  - \*Consider age and creatinine clearance when deciding 50 or 100 mg
- Oxycodone 5 mg every 4 hours prn pain not controlled by acetaminophen and tramadol - #15

2) Risk for High Pain Patients – (Pain > 7 (frequently); taking oxycodone six or more tablets during hospital stay;  $\leq$ age 65y)

- Schedule acetaminophen 1 Gram every 6 hours x 2 weeks
- Schedule Ultram 50 mg or 100 mg every 6 hours x 2 weeks - #30
  - \*Consider age and creatinine clearance when deciding 50 or 100 mg
- Oxycodone 5 mg 1-2 tablets every 4 hours prn pain not relieved by acetaminophen and tramadol - #30

3) Chronic Pain – Provider Discretion (> 12 weeks)
